# Supplementary material for: Co-occurrence across time and space of drug- and cannabinoid- exposure and adverse mental health outcomes in the National Survey of Drug Use and Health: combined geotemporospatial and causal inference analysis
Source: Springer Nature journal article supplement (doi:10.1186/s12889-020-09748-5), 2020-11-04

## Income Rate by Substate Area, 2011 and 2015

Data: US Census Bureau via R::Tidycensus & Areal; Shapefile from SAMHSA, NSDUH

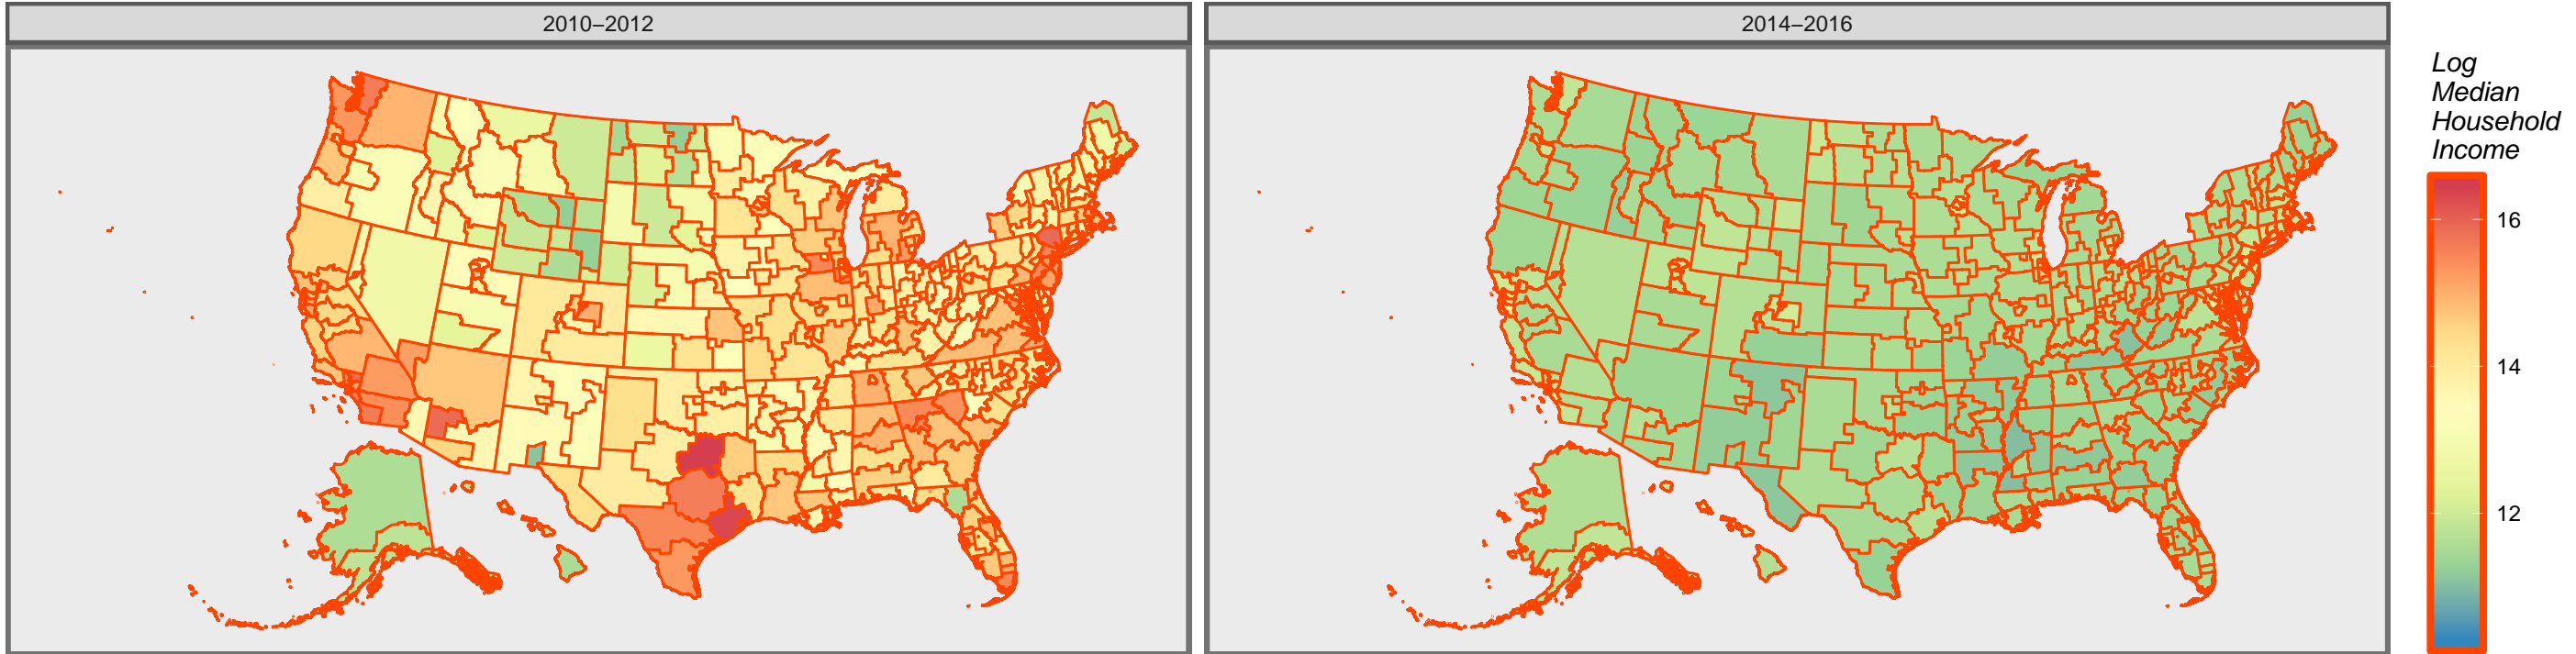

Supplement: MOESM3 [file 12889_2020_9748_MOESM3_ESM.pdf]
