# Supplementary material for: Co-occurrence across time and space of drug- and cannabinoid- exposure and adverse mental health outcomes in the National Survey of Drug Use and Health: combined geotemporospatial and causal inference analysis
Source: Springer Nature journal article supplement (doi:10.1186/s12889-020-09748-5), 2020-11-04

# Ethnic Cannabis Use x Frequency x Cannabis Potency by Substate Area

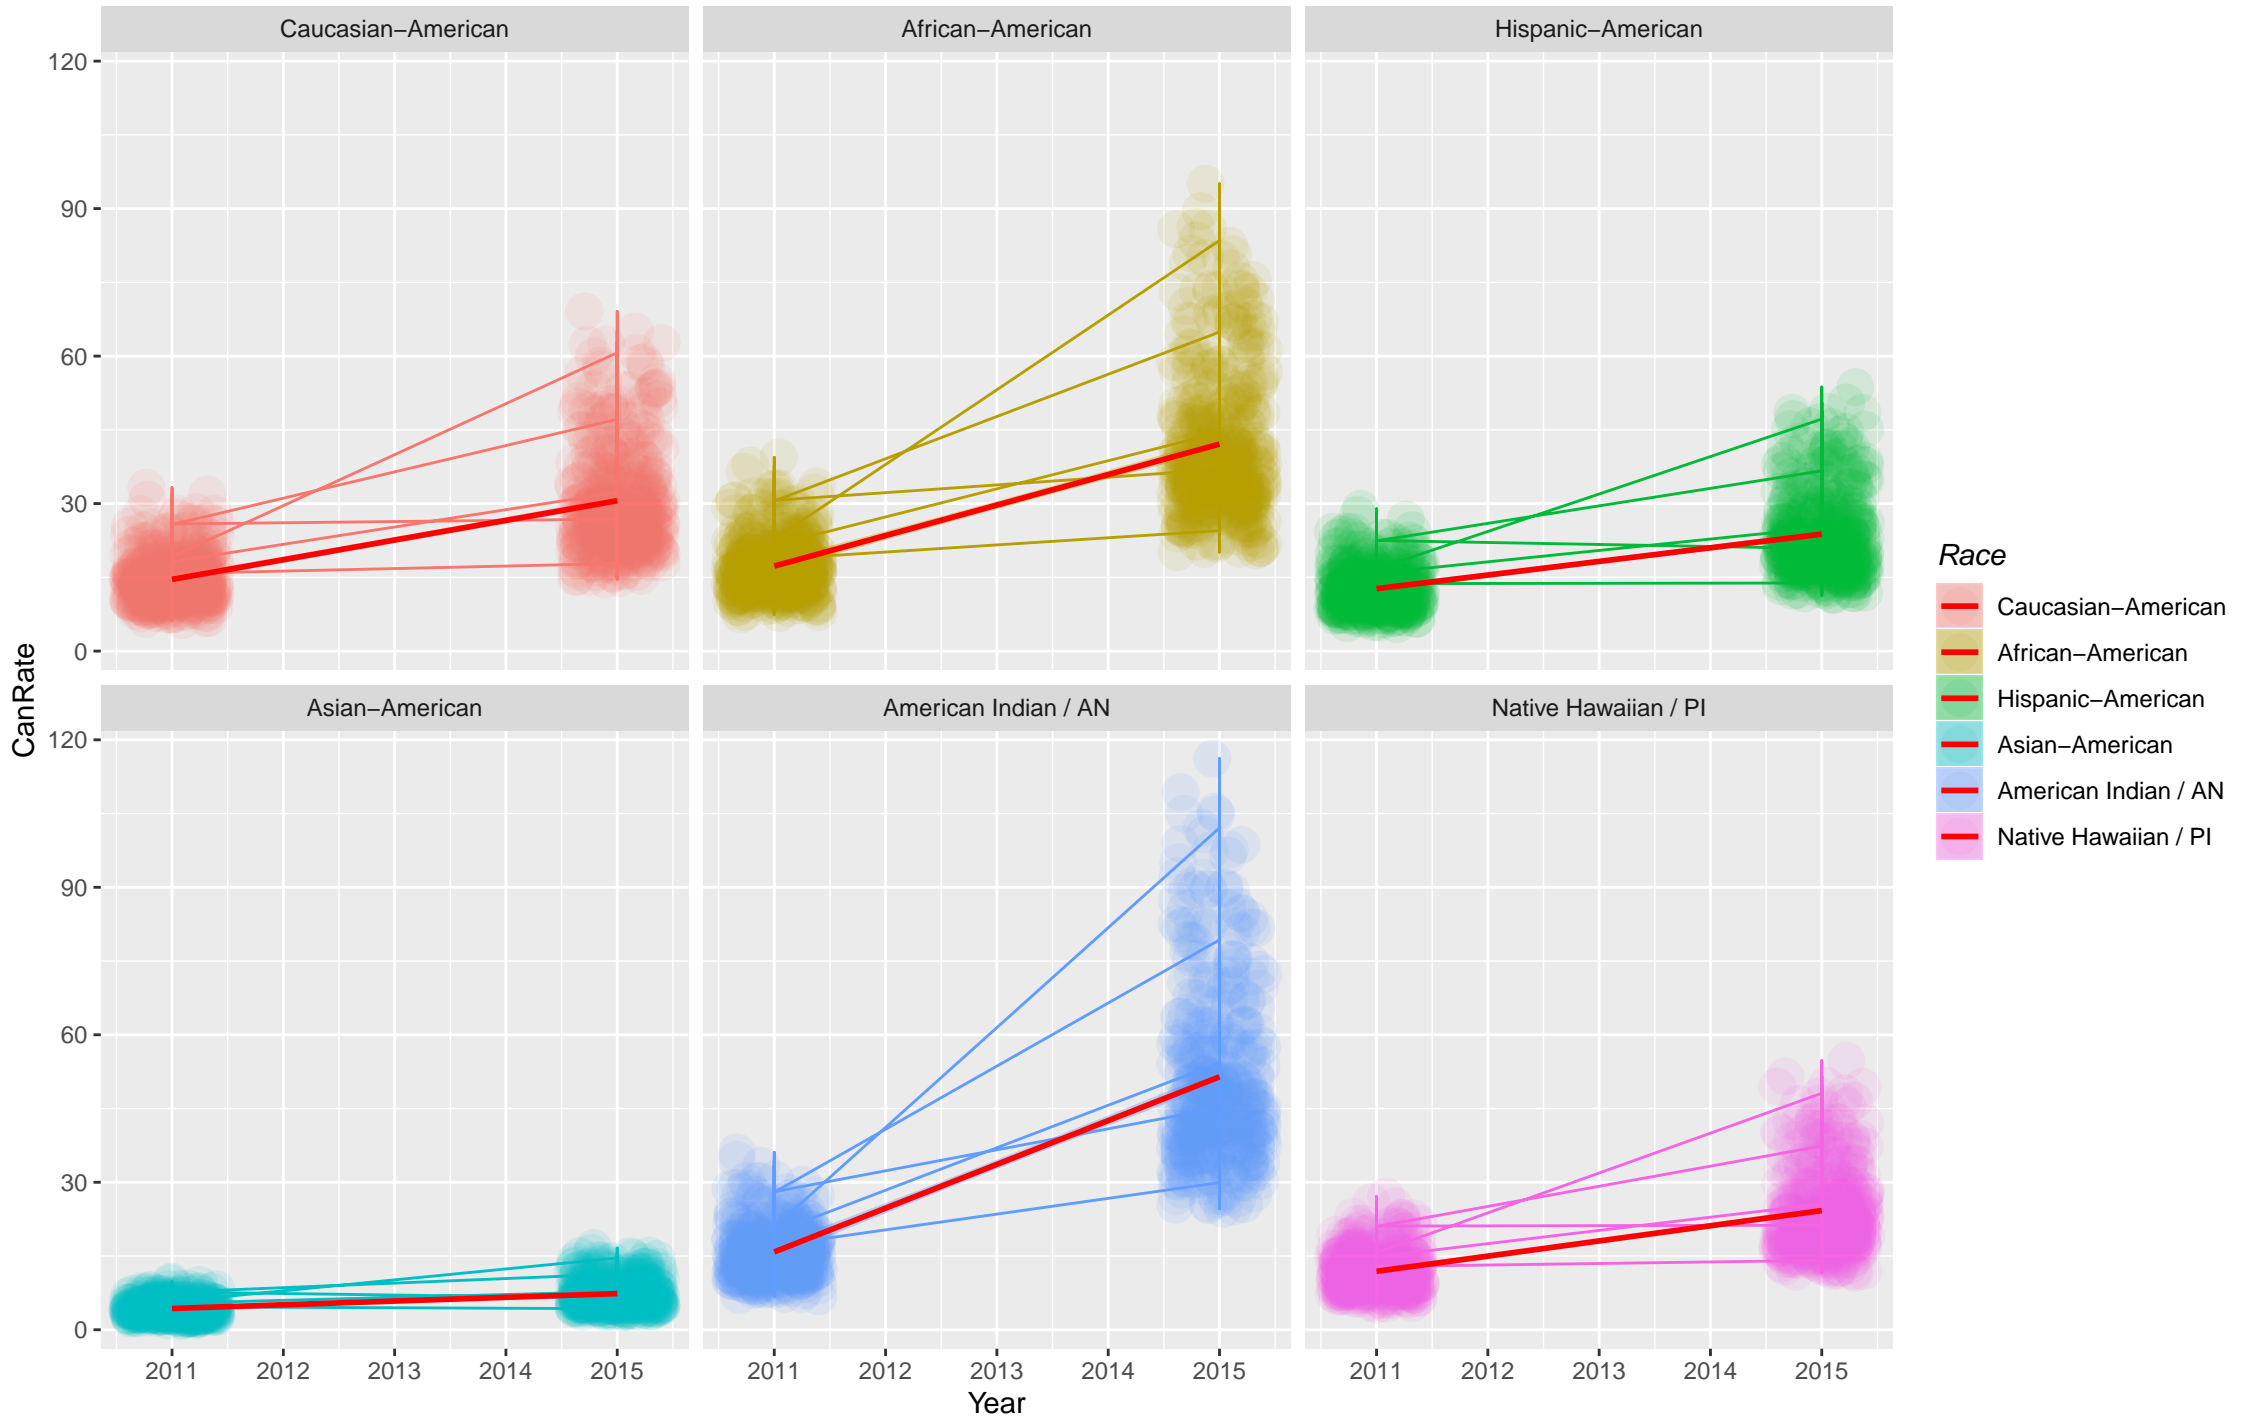

Supplement: MOESM5 [file 12889_2020_9748_MOESM5_ESM.pdf]
