# Supplementary material for: Co-occurrence across time and space of drug- and cannabinoid- exposure and adverse mental health outcomes in the National Survey of Drug Use and Health: combined geotemporospatial and causal inference analysis
Source: Springer Nature journal article supplement (doi:10.1186/s12889-020-09748-5), 2020-11-04

Relative Rise in Cannabis Use x Ethnicity Product

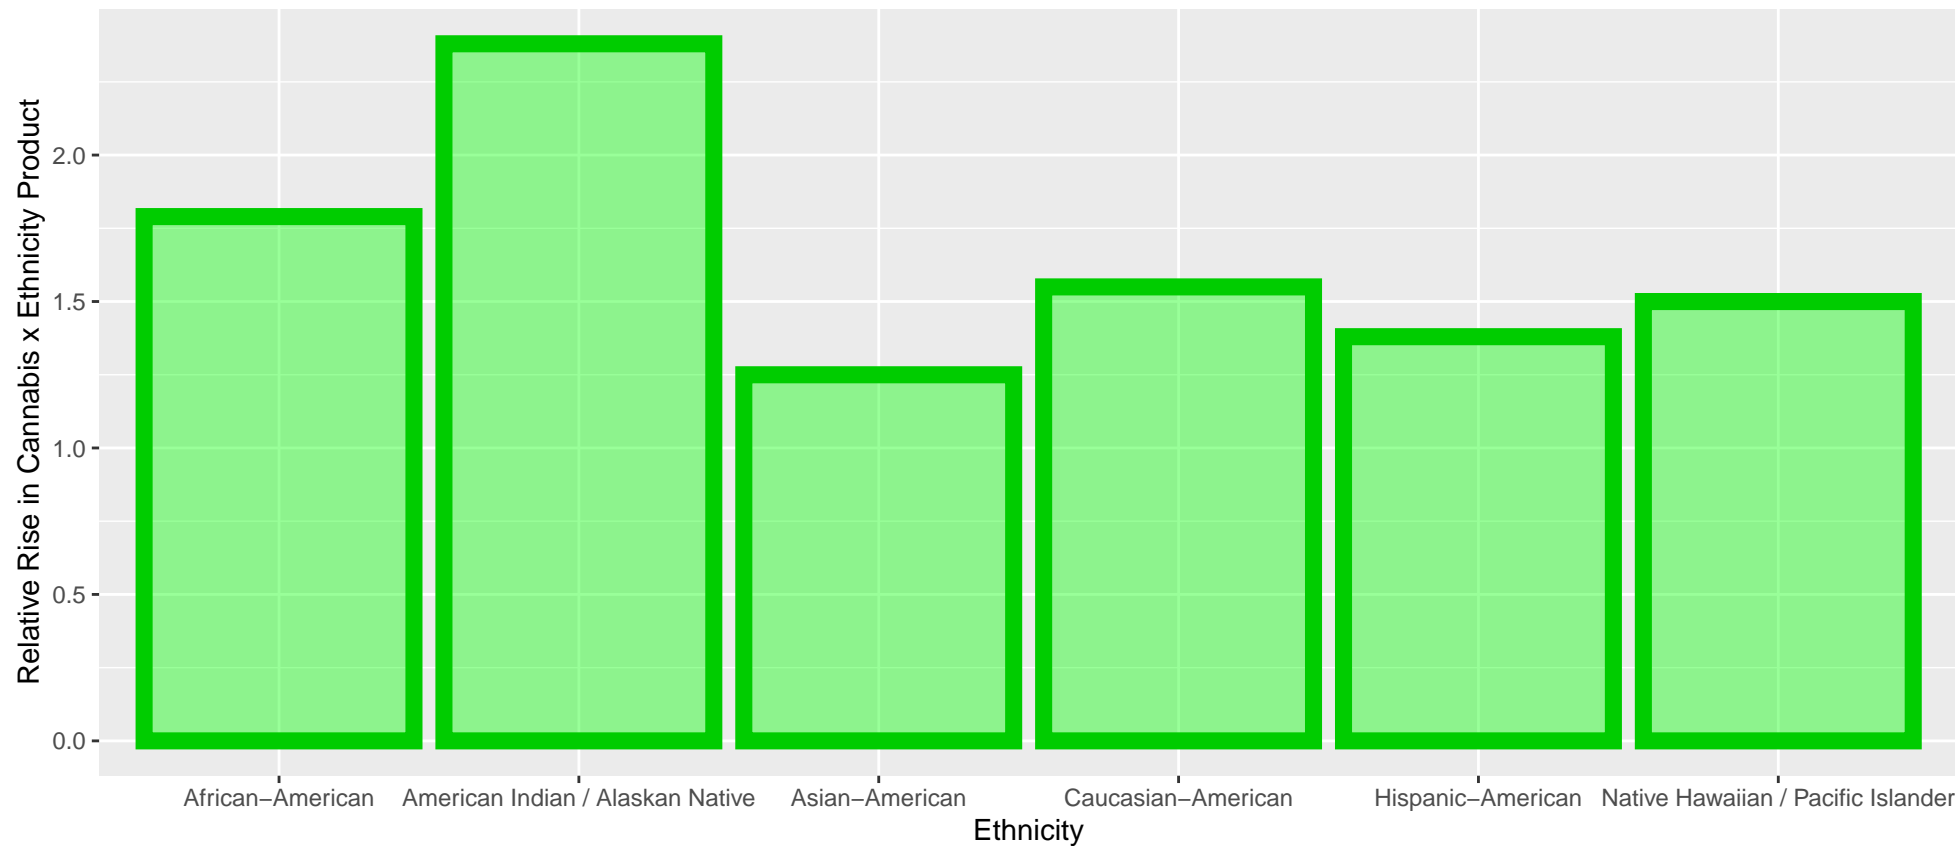

Relative Rise in Cannabis Use x Ethnicity x THC Potency Product

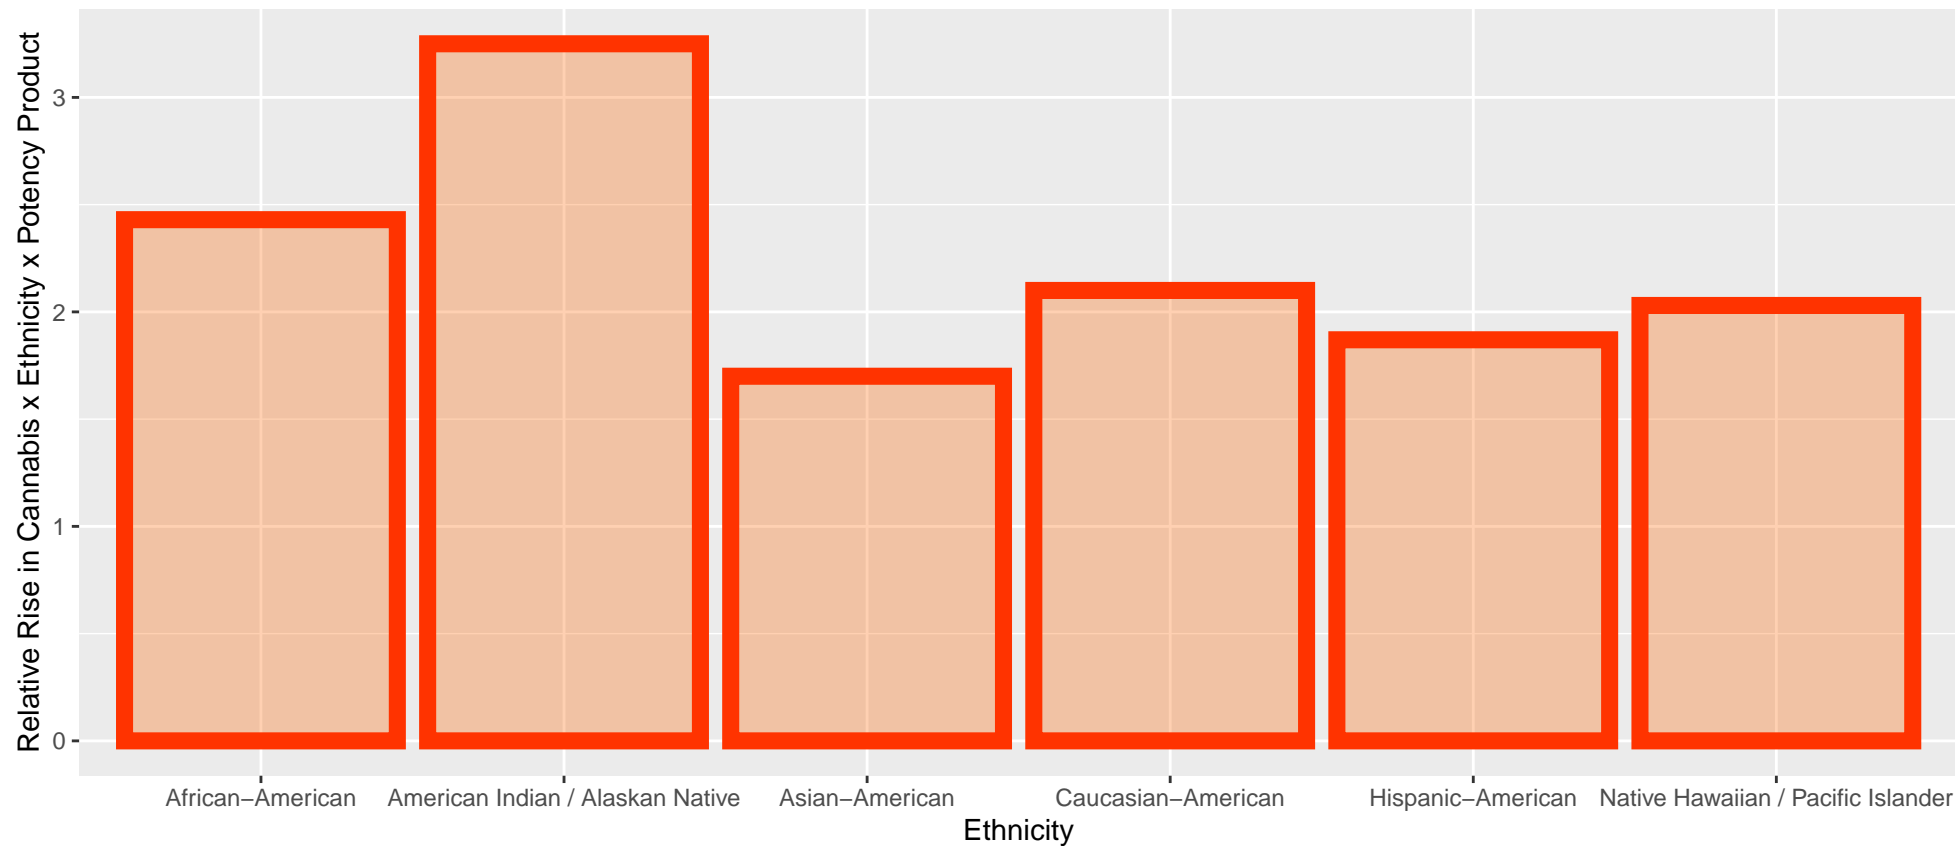

Relative Rise of Above Product Compared to Mean Rise 2011-2015

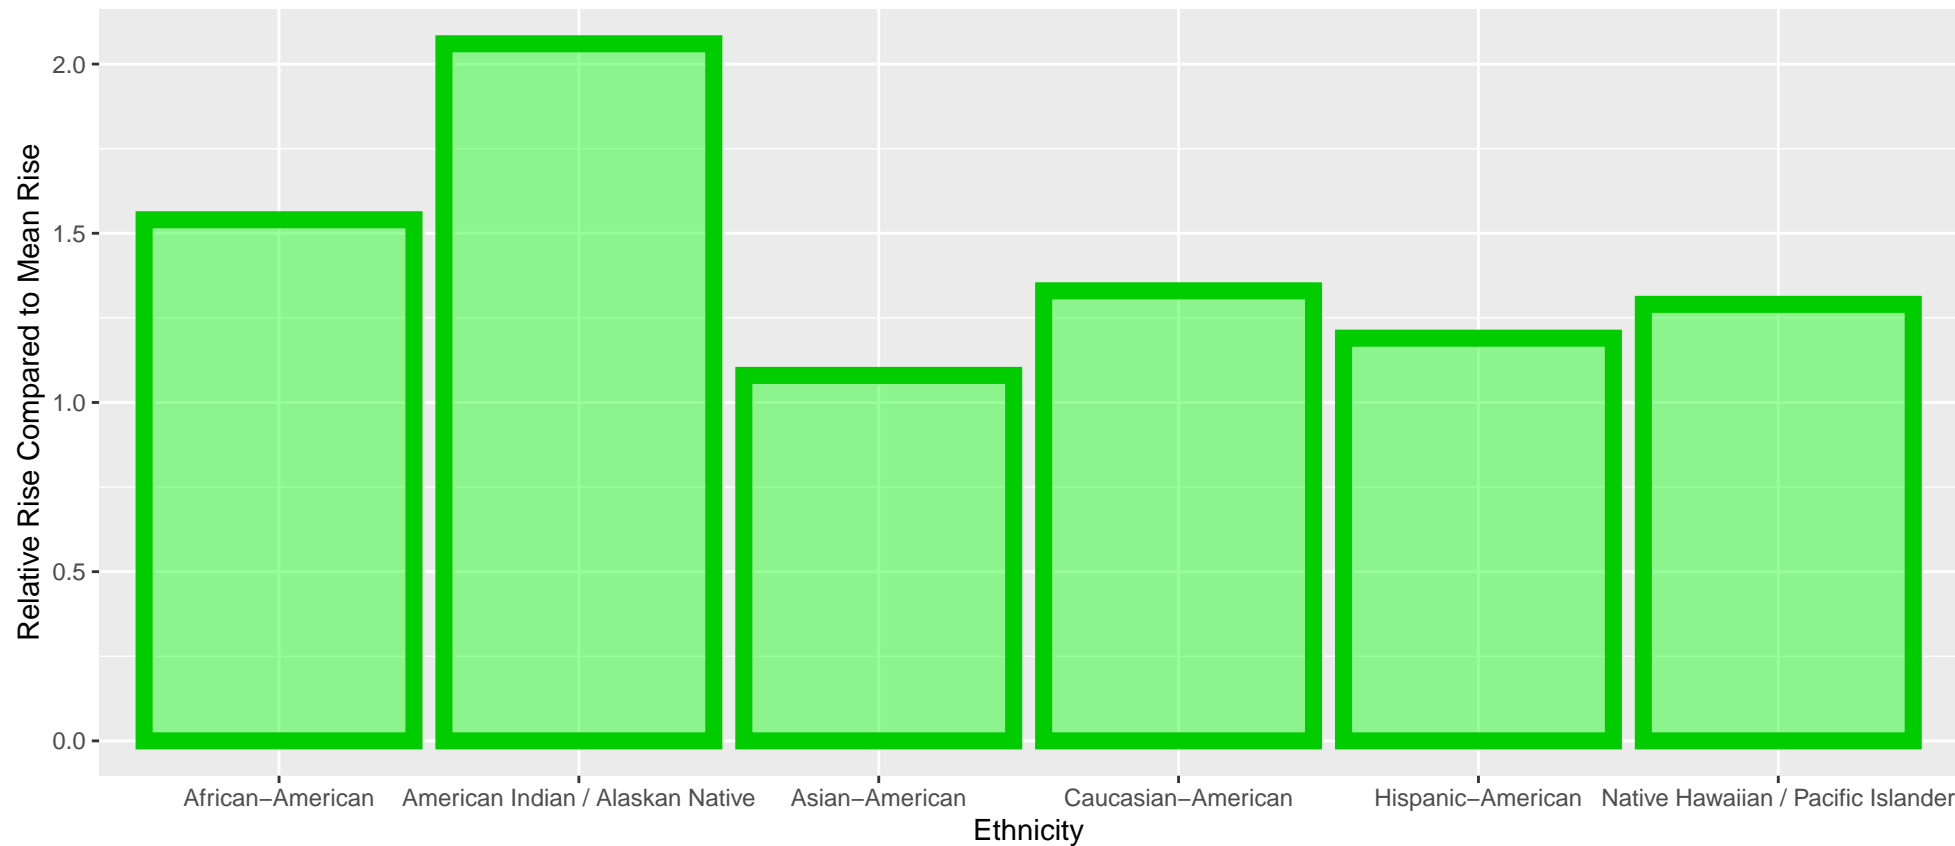

Relative Rise of Above Product Compared to Mean Rise 2011-2015

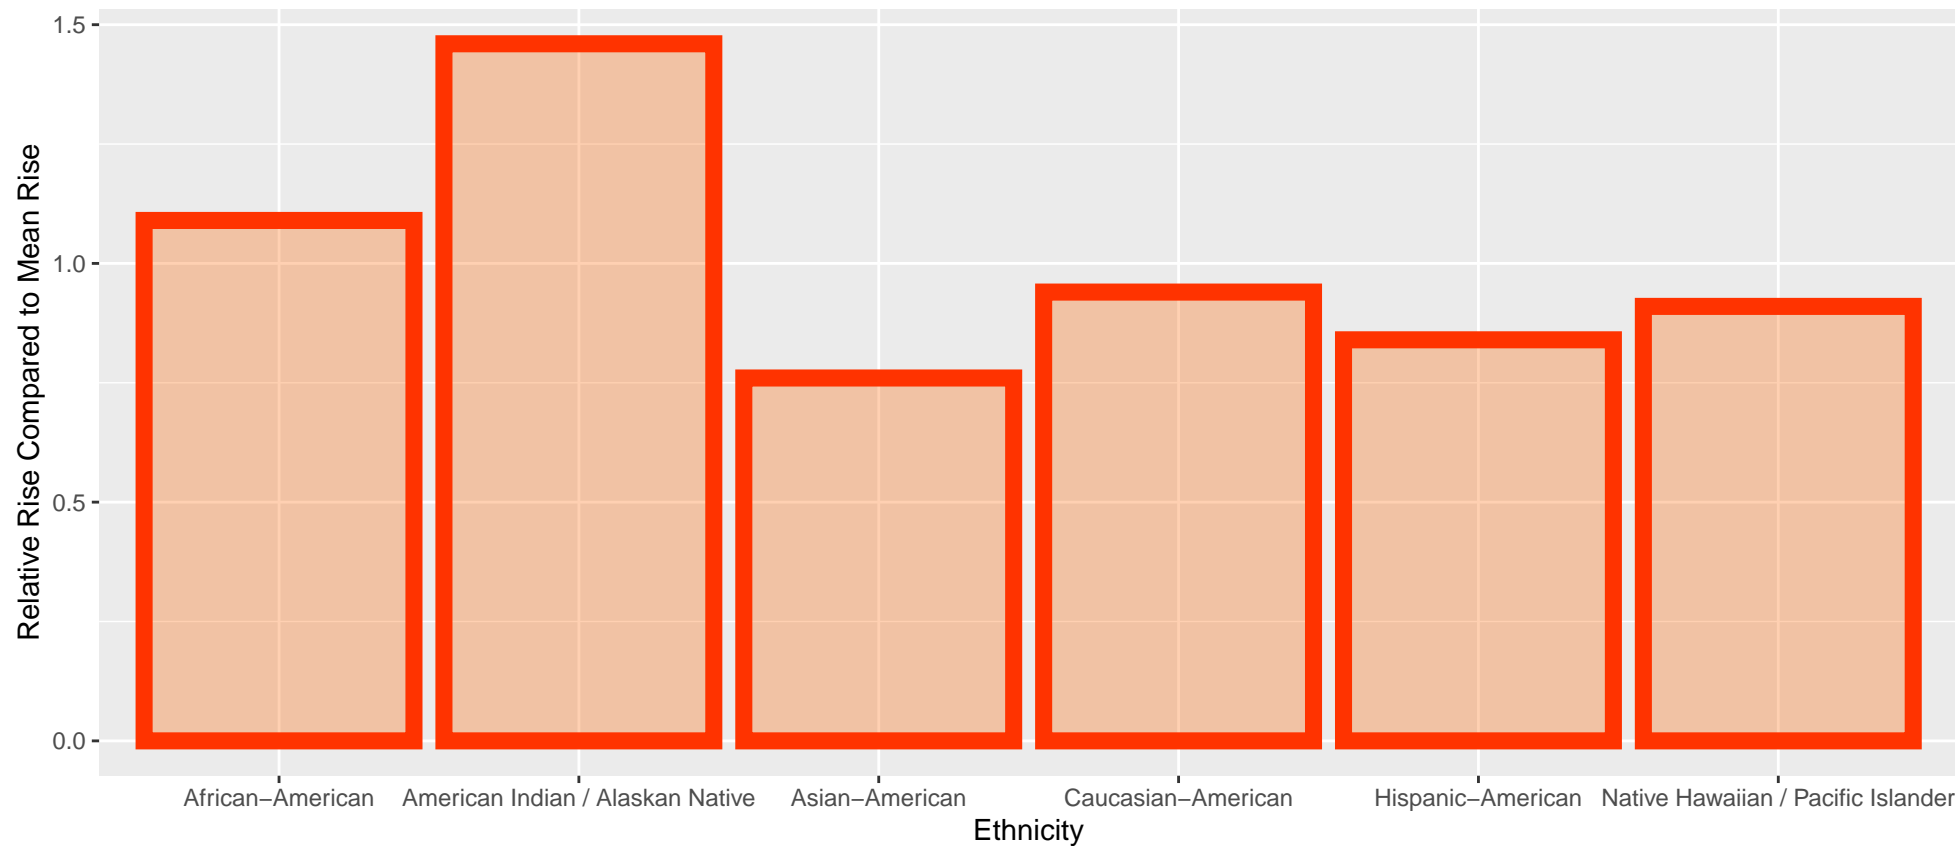

Supplement: MOESM6 [file 12889_2020_9748_MOESM6_ESM.pdf]
