# Supplementary material for: Co-occurrence across time and space of drug- and cannabinoid- exposure and adverse mental health outcomes in the National Survey of Drug Use and Health: combined geotemporospatial and causal inference analysis
Source: Springer Nature journal article supplement (doi:10.1186/s12889-020-09748-5), 2020-11-04

# Mental Illness by Cannabis Legal Status

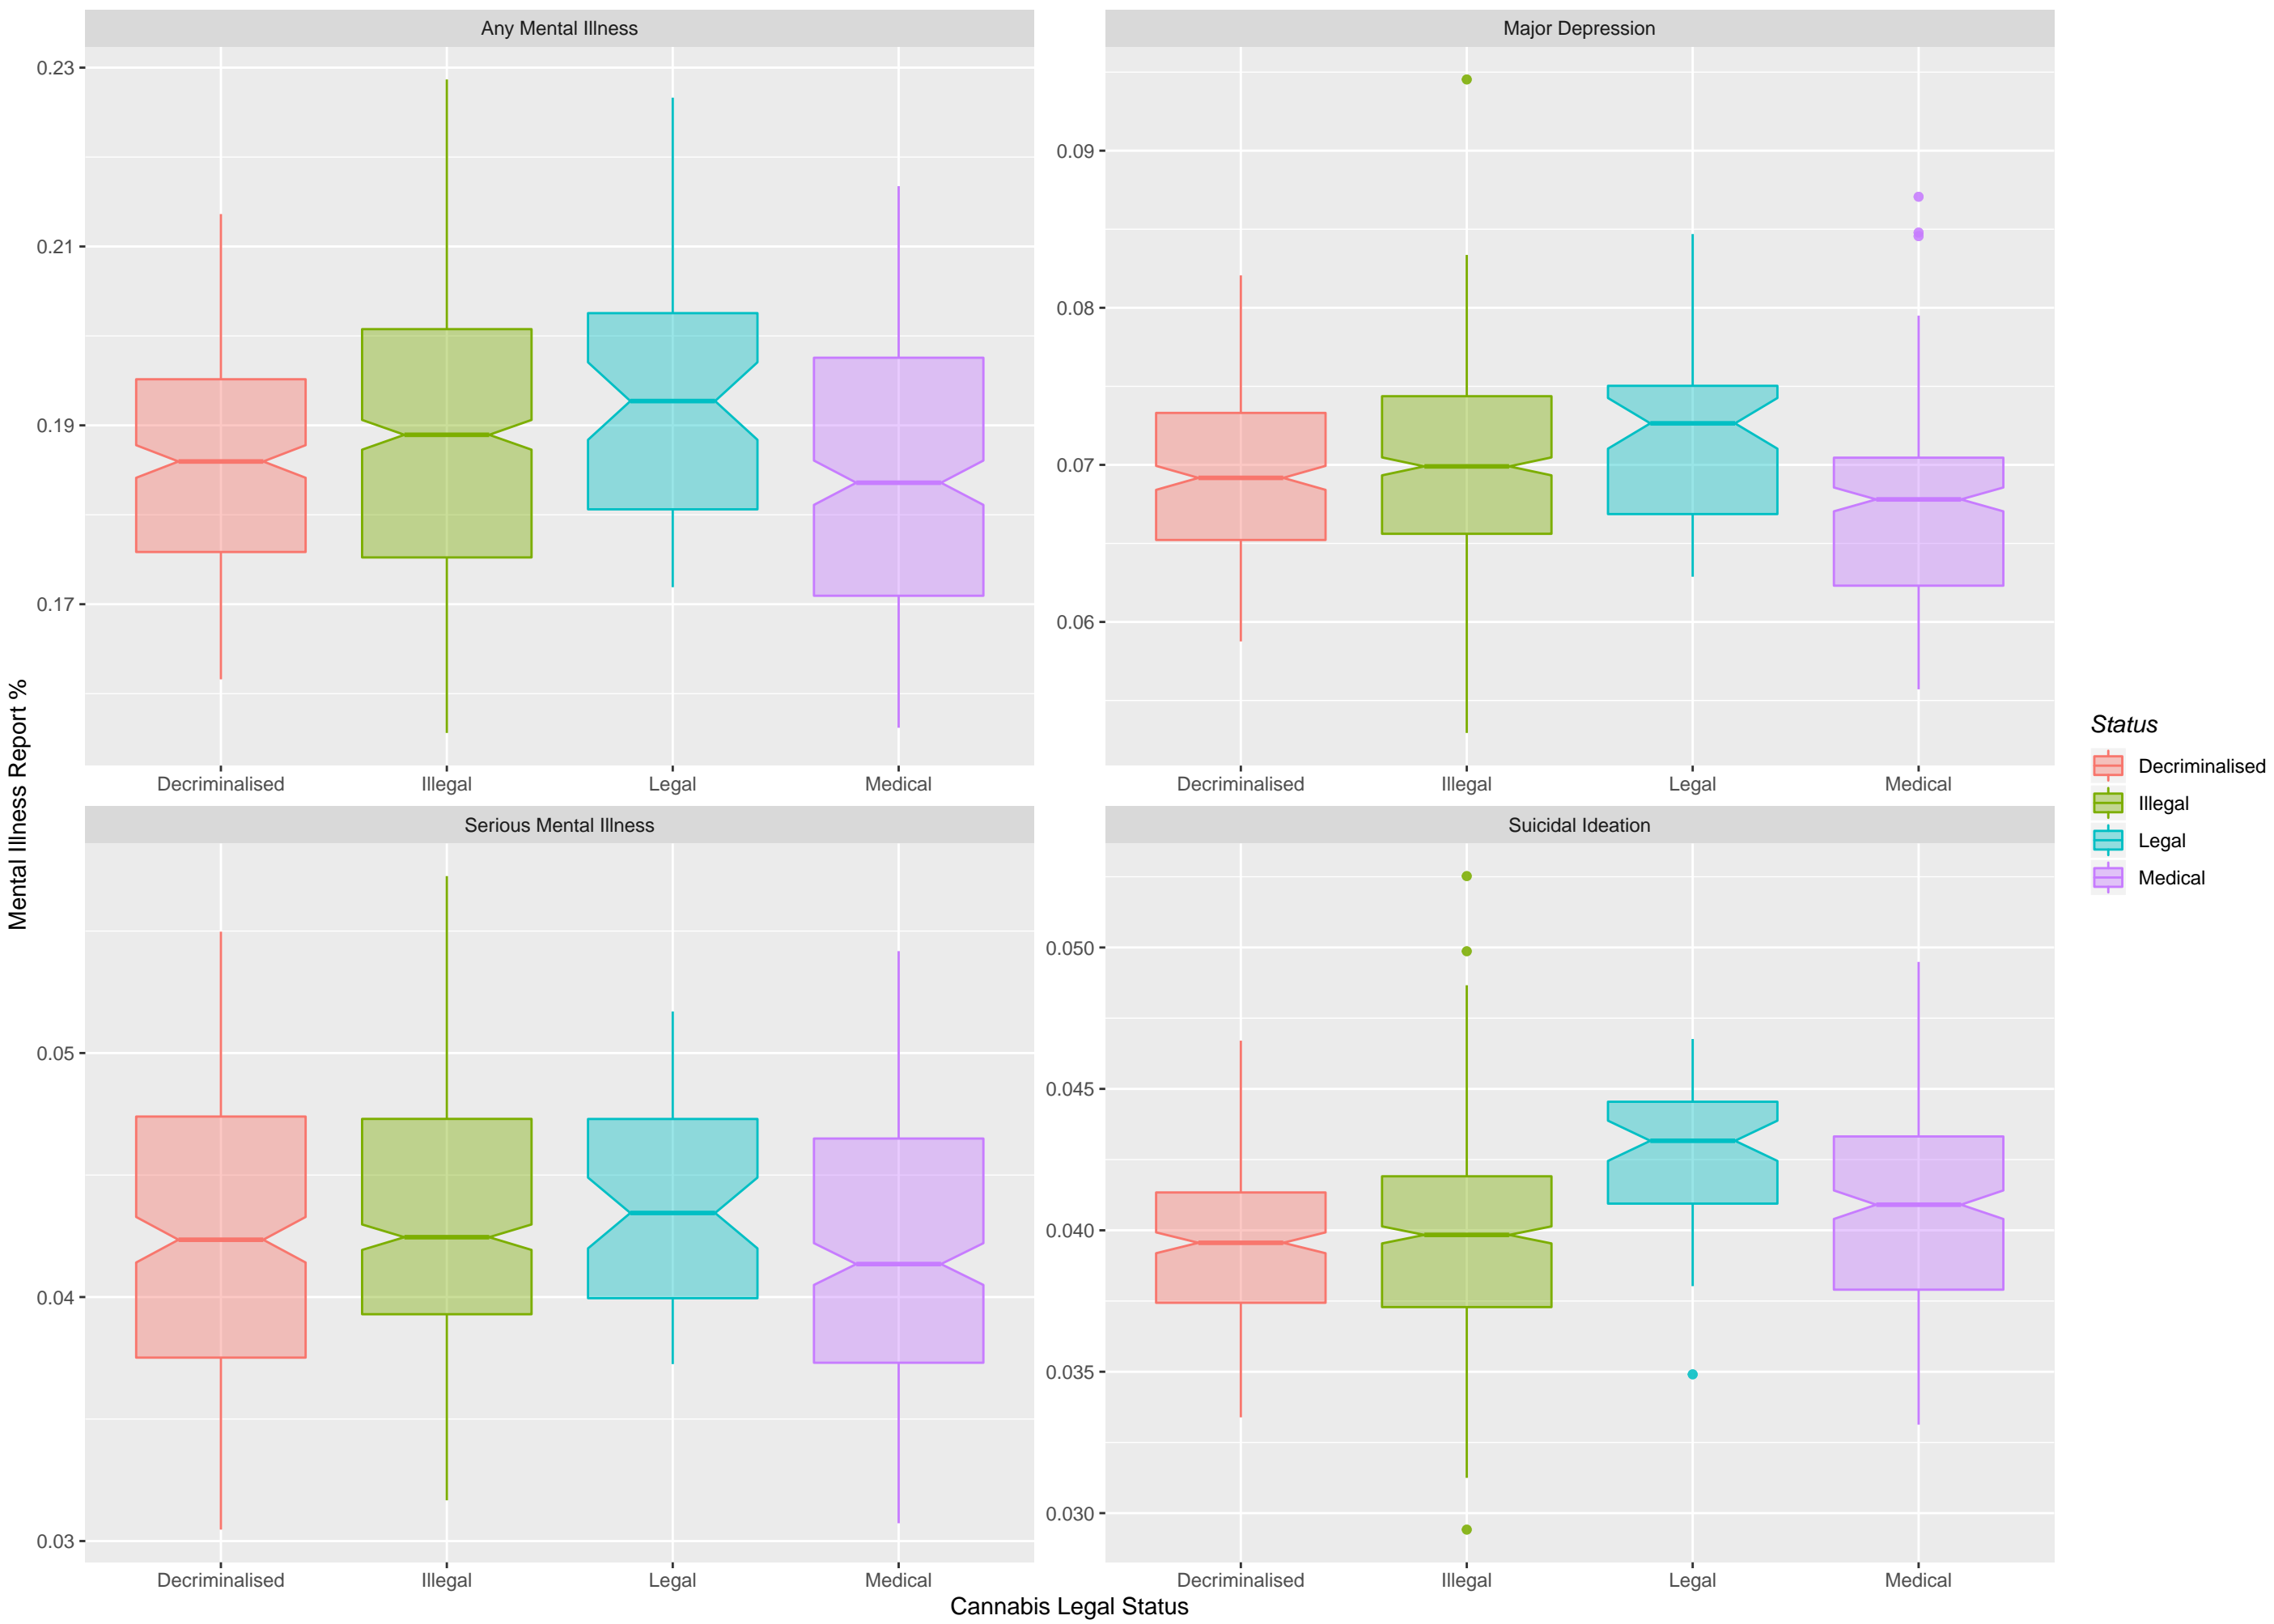

Supplement: MOESM8 [file 12889_2020_9748_MOESM8_ESM.pdf]
